# Supplementary material
Source: Springer Nature journal article supplement (https://www.springermedizin.de/resource/supplementary/12885_2010_2695_MOESM6_ESM.pdf/9461726)

**A**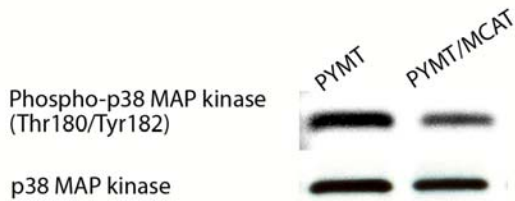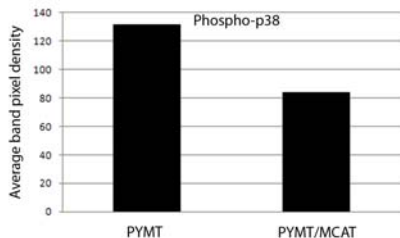**B**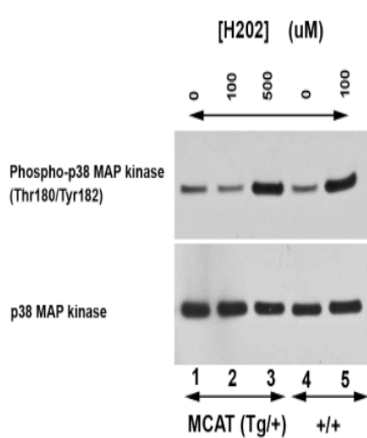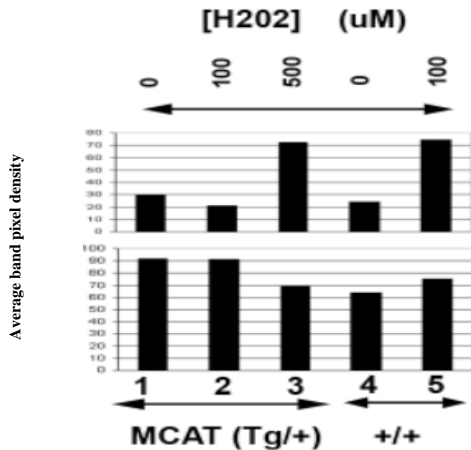

Supplement: MOESM6 [file 9461726]
